# Supplementary material for: The anti-tumor activities of Neferine on cell invasion and oxaliplatin sensitivity regulated by EMT via Snail signaling in hepatocellular carcinoma
Source: PubMed Central journal article supplement (PMC5278559; doi:10.1038/srep41616), 2017-01-30
Supplement: srep41616-s1.pdf [file srep41616-s1.pdf]

**The anti-tumor activities of Neferine on cell invasion and oxaliplatin sensitivity regulated by EMT via Snail signaling in hepatocellular carcinoma**

Author name: Ganlu Deng <sup>1,2</sup>, Shan Zeng <sup>1,2,3</sup>, Junli Ma <sup>2,3</sup>, Yan Zhang <sup>1,2</sup>, Yanling Qu<sup>1,2</sup>,  
Ying Han <sup>1,2</sup>, Ling Yin <sup>1,2</sup>, Changjing Cai <sup>1,2</sup>, Cao Guo <sup>1,3</sup>, Hong Shen <sup>1,2,3</sup> \*.

Author's affiliation: 1 Institute of Medical Sciences, 2 Department of Oncology, 3 Key  
Laboratory for Molecular Radiation Oncology of Hunan Province, Xiangya Hospital,  
Central South University, Changsha, Hunan, China 410008

\* Address reprint requests to: Dr. Hong Shen,  
Institute of Medical Sciences, Xiangya Hospital,  
Central South University, Changsha, Hunan, China 410008.  
Tel: (86) 731-8432-7633  
E-mail: hongshen2000@csu.edu.cn

Supplementary Information includes:  
Supplementary Figure S1-S5.

# Figure S1

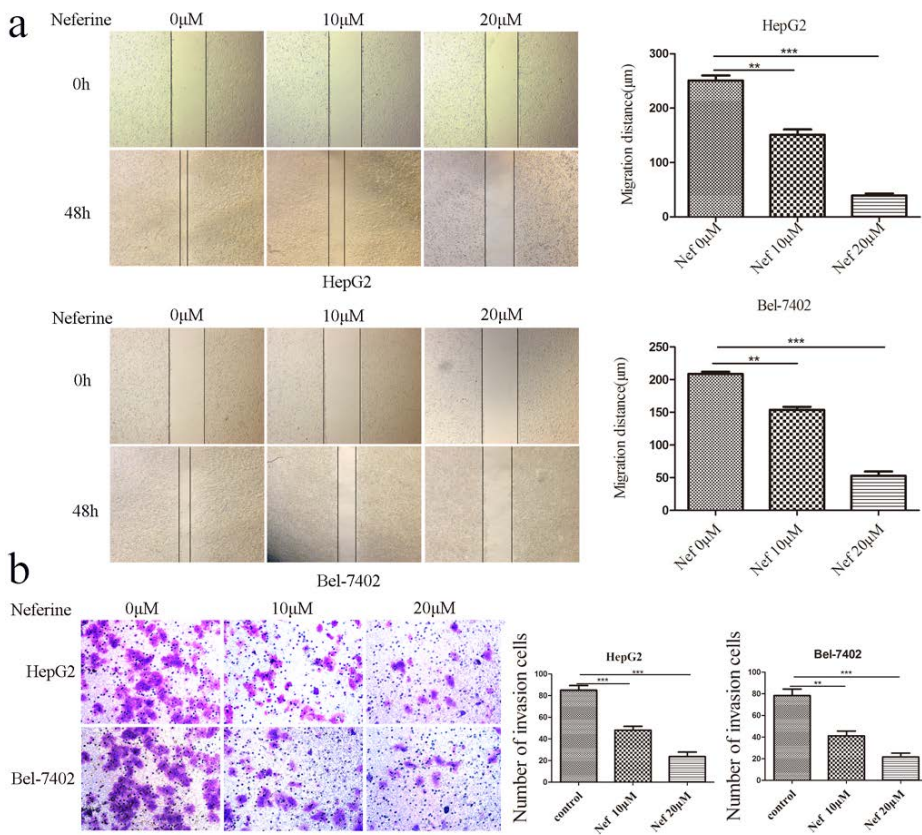

Figure S1: HCC cells migration, invasion ability inhibited by Neferine alone in vitro. (a) Migration ability tested by wound healing assay in HepG2 and Bel-7402 cells treated with Neferine at different concentrations. (b) Invasion ability examined by transwell assay in HepG2 and Bel-7402 cells treated with Neferine. \*:  $p < 0.05$ , \*\*:  $p < 0.01$ , \*\*\*:  $p < 0.001$ .

# Figure S2

Figure S2: The suppression effects of Neferine on EMT in HCC cells. (a & b) mRNA and protein expression of epithelial marker (E-cadherin), mesenchymal markers (N-cadherin & Vimentin), and EMT promoting transcription factor (Snail), which was determined by qRT-PCR and by Western blot in HCC cells treated with Neferine at different concentrations. (c) Representative double immunofluorescence staining for expression and co-localization of E-cadherin and Vimentin in HCC (Original magnification:  $\times 400$ ).

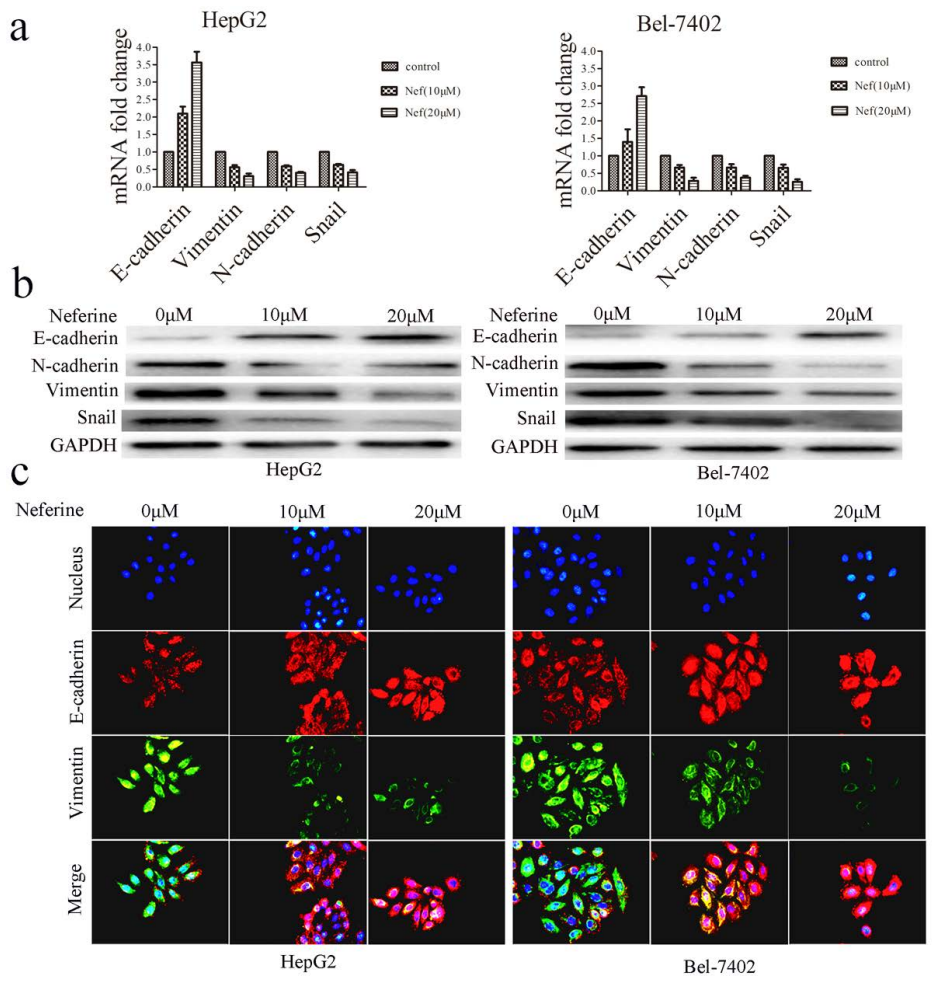

## Figure S3

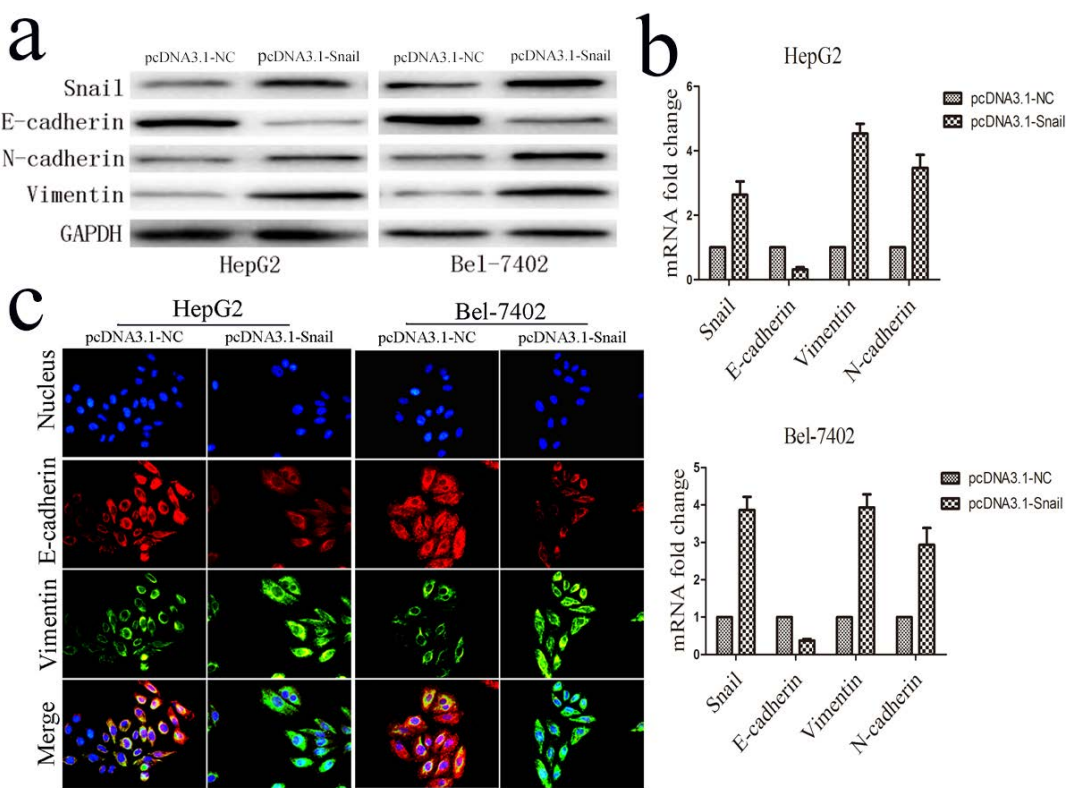

Figure S3: Snail overexpression promoted HCC EMT. (a & b) HCC EMT phenotype enhanced by Snail overexpression via increasing expression of mesenchymal markers and decreasing expression of epithelial marker. HepG2 and Bel-7402 cells were transfected by pcDNA3.1-Snail and pcDNA3.1-NC vectors for 48 hrs, respectively. (c) Expression and co-localization of E-cadherin and Vimentin protein in HepG2 and Bel-7402 cells regulated by overexpressed Snail, which was imaged by double immunofluorescence staining (Original magnification:  $\times 400$ ).

## Figure S4

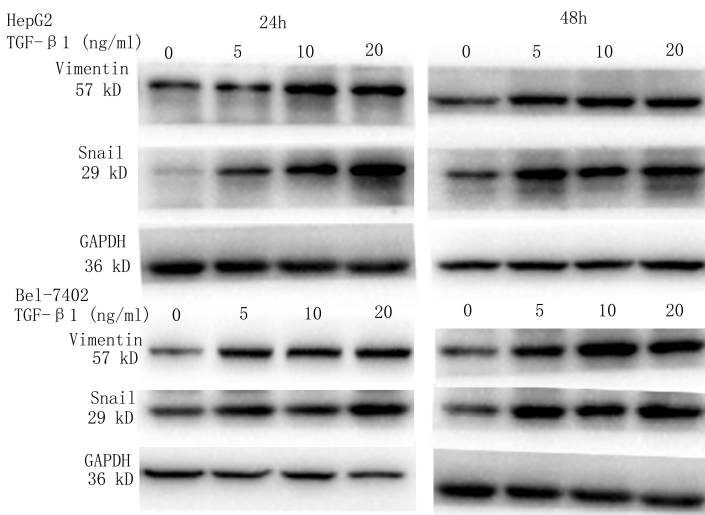

Figure S4: Original blots of high-contrast blots of Figure 3b. TGF- $\beta 1$  induced EMT progress. HCC cells were treated with 5 ng/ml, 10 ng/ml, 20 ng/ml TGF- $\beta 1$  for 24 hrs or 48 hrs to induce EMT. EMT biomarkers and EMT promoting transcription factor was determined by Western blot.

## Figure S5

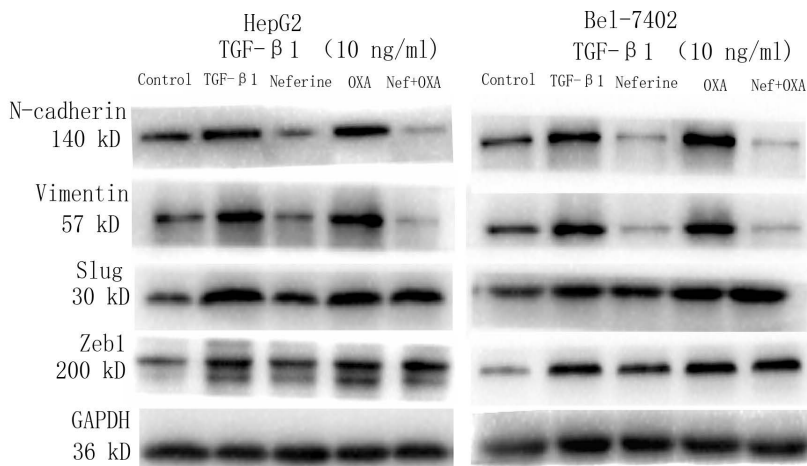

Figure S5: Original blots of high-contrast blots of Figure 4b. The suppression effects of Neferine on TGF- $\beta 1$ -induced EMT in HCC cells. Protein expression of EMT markers and EMT promoting transcription factors were determined Western blot in TGF- $\beta 1$ -induced HCC cells treated with Neferine and/or OXA.
